# Supplementary material for: Wildlife resistance and protection in a changing New England landscape
Source: PubMed Central journal article supplement (PMC7515594; doi:10.1371/journal.pone.0239525), 2020-09-24
Supplement: pone.0239525.s001.pdf [file pone.0239525.s001.pdf]

**S1 Table. Distribution change statistics for nine wildlife species in the New England region of the northeastern United States.** Statistics were calculated from scenario-simulated distribution change maps (2010 – 2060) derived from species-specific distribution models developed by [62] and landscape change scenarios developed by the New England Landscape Futures Project [31,58].

| Species             | Scenario | Mean  | Standard deviation | Minimum | Quartiles |       |       | Maximum |
|---------------------|----------|-------|--------------------|---------|-----------|-------|-------|---------|
|                     |          |       |                    |         | 25%       | 50%   | 75%   |         |
| American black bear | RT       | -0.12 | 0.22               | -0.94   | -0.20     | -0.05 | 0.00  | 0.82    |
|                     | GG       | -0.15 | 0.25               | -0.96   | -0.25     | -0.05 | 0.00  | 0.79    |
|                     | GA       | -0.09 | 0.19               | -0.93   | -0.13     | -0.03 | 0.01  | 0.81    |
|                     | YC       | -0.14 | 0.23               | -0.95   | -0.21     | -0.05 | 0.00  | 0.83    |
|                     | CC       | -0.11 | 0.20               | -0.93   | -0.18     | -0.04 | 0.00  | 0.81    |
| Bobcat              | RT       | -0.04 | 0.07               | -0.65   | -0.08     | -0.03 | 0.01  | 0.41    |
|                     | GG       | -0.04 | 0.11               | -0.66   | -0.06     | 0.00  | 0.03  | 0.39    |
|                     | GA       | -0.04 | 0.07               | -0.65   | -0.08     | -0.03 | 0.01  | 0.41    |
|                     | YC       | -0.05 | 0.08               | -0.53   | -0.09     | -0.03 | 0.00  | 0.38    |
|                     | CC       | -0.02 | 0.07               | -0.59   | -0.06     | -0.01 | 0.02  | 0.44    |
| Coyote              | RT       | -0.03 | 0.04               | -0.32   | -0.04     | -0.02 | 0.00  | 0.57    |
|                     | GG       | -0.02 | 0.05               | -0.38   | -0.03     | -0.01 | 0.00  | 0.76    |
|                     | GA       | -0.03 | 0.04               | -0.37   | -0.04     | -0.02 | 0.00  | 0.39    |
|                     | YC       | -0.03 | 0.04               | -0.37   | -0.05     | -0.02 | -0.01 | 0.39    |
|                     | CC       | -0.03 | 0.04               | -0.37   | -0.04     | -0.01 | 0.00  | 0.40    |
| Moose               | RT       | -0.27 | 0.19               | -0.94   | -0.42     | -0.27 | -0.10 | 0.87    |
|                     | GG       | -0.15 | 0.18               | -0.94   | -0.27     | -0.11 | -0.01 | 0.70    |
|                     | GA       | -0.10 | 0.14               | -0.94   | -0.19     | -0.07 | 0.00  | 0.73    |
|                     | YC       | -0.33 | 0.19               | -0.94   | -0.47     | -0.35 | -0.18 | 0.74    |
|                     | CC       | -0.22 | 0.18               | -0.94   | -0.36     | -0.21 | -0.07 | 0.76    |
| Raccoon             | RT       | -0.05 | 0.05               | -0.37   | -0.08     | -0.04 | 0.00  | 0.43    |
|                     | GG       | -0.02 | 0.06               | -0.36   | -0.05     | -0.01 | 0.02  | 0.51    |
|                     | GA       | -0.05 | 0.05               | -0.37   | -0.08     | -0.04 | -0.01 | 0.44    |
|                     | YC       | -0.05 | 0.06               | -0.37   | -0.08     | -0.04 | 0.00  | 0.43    |
|                     | CC       | -0.05 | 0.05               | -0.35   | -0.08     | -0.04 | -0.01 | 0.43    |
| Red fox             | RT       | 0.19  | 0.08               | -0.46   | 0.15      | 0.19  | 0.22  | 0.72    |
|                     | GG       | 0.19  | 0.08               | -0.42   | 0.16      | 0.20  | 0.23  | 0.68    |
|                     | GA       | 0.19  | 0.08               | -0.45   | 0.15      | 0.19  | 0.22  | 0.72    |
|                     | YC       | 0.19  | 0.08               | -0.43   | 0.15      | 0.19  | 0.22  | 0.72    |
|                     | CC       | 0.19  | 0.08               | -0.46   | 0.15      | 0.20  | 0.22  | 0.71    |
| Striped skunk       | RT       | -0.04 | 0.06               | -0.48   | -0.08     | -0.04 | 0.00  | 0.63    |
|                     | GG       | 0.00  | 0.05               | -0.45   | -0.03     | 0.00  | 0.02  | 0.67    |
|                     | GA       | -0.05 | 0.06               | -0.54   | -0.08     | -0.04 | 0.00  | 0.64    |
|                     | YC       | -0.05 | 0.06               | -0.54   | -0.08     | -0.04 | 0.00  | 0.64    |
|                     | CC       | -0.04 | 0.06               | -0.46   | -0.07     | -0.03 | 0.00  | 0.64    |
| White-tailed deer   | RT       | 0.00  | 0.08               | -0.85   | -0.03     | 0.00  | 0.02  | 0.91    |
|                     | GG       | -0.04 | 0.10               | -0.88   | -0.06     | -0.02 | 0.01  | 0.87    |
|                     | GA       | -0.02 | 0.09               | -0.85   | -0.06     | -0.03 | 0.00  | 0.91    |
|                     | YC       | 0.00  | 0.08               | -0.85   | -0.03     | 0.00  | 0.02  | 0.91    |
|                     | CC       | -0.01 | 0.07               | -0.85   | -0.04     | -0.01 | 0.01  | 0.92    |
| Wild turkey         | RT       | -0.16 | 0.16               | -0.94   | -0.26     | -0.15 | -0.06 | 0.80    |
|                     | GG       | -0.11 | 0.18               | -0.95   | -0.21     | -0.08 | 0.01  | 0.85    |
|                     | GA       | -0.15 | 0.16               | -0.94   | -0.25     | -0.14 | -0.05 | 0.81    |
|                     | YC       | -0.17 | 0.16               | -0.95   | -0.26     | -0.16 | -0.06 | 0.81    |
|                     | CC       | -0.16 | 0.16               | -0.94   | -0.25     | -0.15 | -0.05 | 0.81    |
