# Supplementary material for: Wildlife resistance and protection in a changing New England landscape
Source: PubMed Central journal article supplement (PMC7515594; doi:10.1371/journal.pone.0239525), 2020-09-24
Supplement: pone.0239525.s003.pdf [file pone.0239525.s003.pdf]

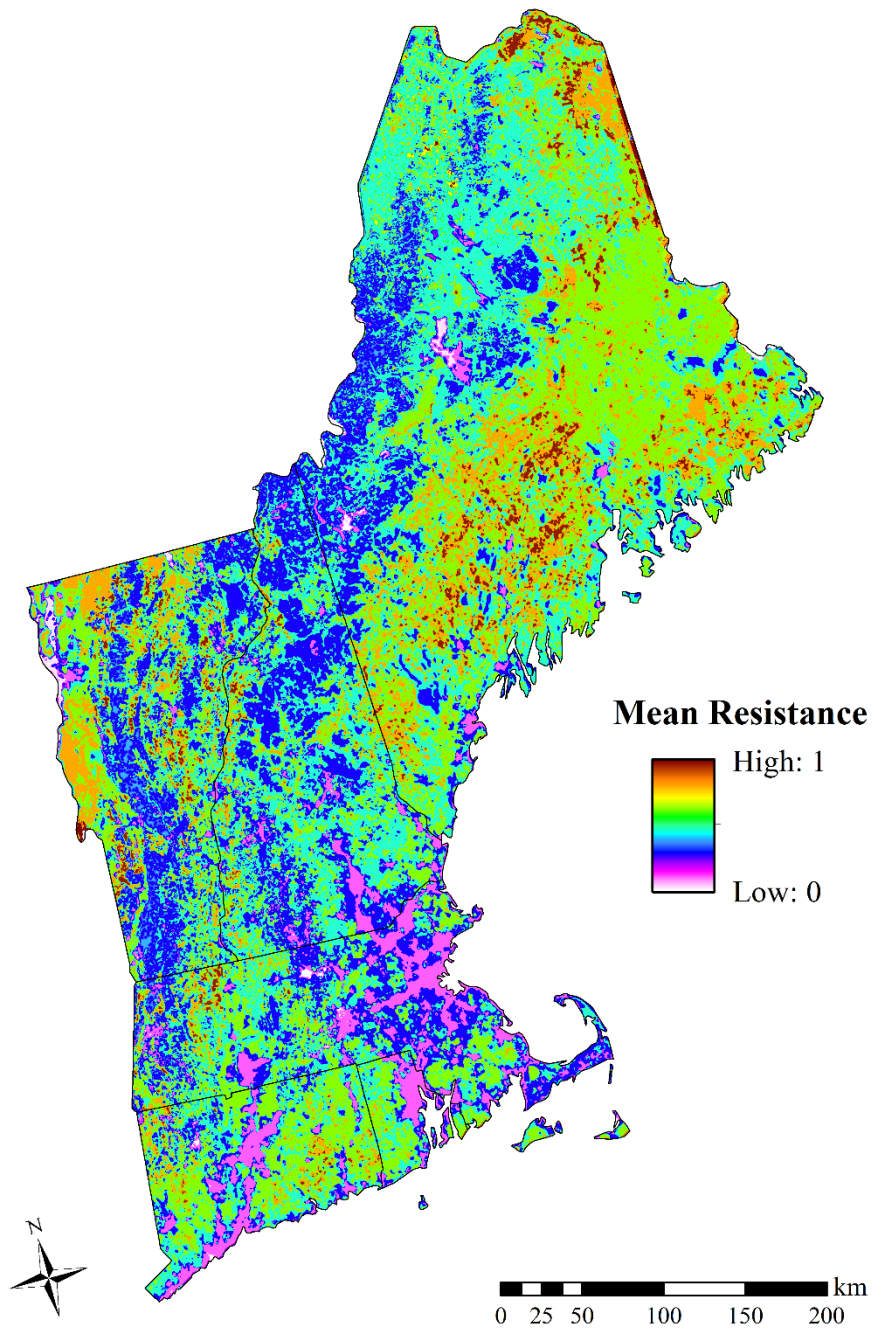

**S2 Fig. Average focal species resistance throughout New England, USA.**

Map displays mean species resistance between 2010 and 2060 based on binary resistance maps for nine focal wildlife: American black bear, bobcat, coyote, moose, raccoon, red fox, striped skunk, white-tailed deer, and wild turkey.
